# Supplementary material
Source: PubMed Central journal article supplement (PMC2907408)
Supplement: djq238_1.pdf [file djq238_1.pdf]

**Supplemental Table 1. Institutions and Investigators: Childhood Cancer Survivor Study (CCSS)**

The CCSS is a collaborative, multi-institutional project, funded as a resource by the National Cancer Institute (NCI), of individuals who survived 5 years or more after a diagnosis of childhood cancer. CCSS is a retrospectively ascertained cohort of 20,346 childhood cancer survivors who were diagnosed when younger than age 21 years between 1970 and 1986 and approximately 4000 siblings of survivors who serve as a control group. The cohort was assembled through the efforts of 26 participating clinical research centers in the United States and Canada. The study is currently funded by a U24 resource grant (NCI grant U24 CA55727) awarded to St. Jude Children's Research Hospital. Currently, we are in the process of expanding the cohort to include an additional 14,000 childhood cancer survivors who were diagnosed when younger than age 21 years between 1987 and 1999. For information on how to access and utilize the CCSS resource, visit [www.stjude.org/ccss](http://www.stjude.org/ccss).

**CCSS Institutions and Investigators**

|                                                                             |                                                                                                                                                                                                                                                                  |
|-----------------------------------------------------------------------------|------------------------------------------------------------------------------------------------------------------------------------------------------------------------------------------------------------------------------------------------------------------|
| St. Jude Children's Research Hospital, Memphis, TN                          | Leslie L. Robison, PhD <sup>†‡</sup> , Melissa Hudson, MD <sup>*†</sup><br>Greg T. Armstrong, MD, MSCE <sup>†</sup> ,<br>Daniel M. Green, MD <sup>†</sup> , Kevin R. Krull, PhD <sup>†</sup><br>Lillian Meacham, MD <sup>*</sup> , Ann Mertens, PhD <sup>†</sup> |
| Children's Healthcare of Atlanta/Emory University<br>Atlanta, GA            |                                                                                                                                                                                                                                                                  |
| Children's Hospitals and Clinics of Minnesota<br>Minneapolis - St. Paul, MN | Joanna Perkins, MD, MS <sup>*</sup>                                                                                                                                                                                                                              |
| Seattle Children's Hospital, Seattle, WA                                    | Scott Baker, MD <sup>*</sup> , Eric Chow, MD, MPH <sup>†</sup>                                                                                                                                                                                                   |
| Children's Hospital, Denver, CO                                             | Brian Greffe, MD <sup>*</sup>                                                                                                                                                                                                                                    |
| Children's Hospital Los Angeles, CA                                         | Kathy Ruccione, RN, MPH <sup>*</sup>                                                                                                                                                                                                                             |
| Children's Hospital, Oklahoma City, OK                                      | John Mulvihill, MD <sup>*†</sup>                                                                                                                                                                                                                                 |
| Children's Hospital of Orange County, Orange, CA                            | Leonard Sender, MD <sup>*</sup>                                                                                                                                                                                                                                  |
| Children's Hospital of Philadelphia, Philadelphia, PA                       | Jill Ginsberg, MD <sup>*</sup> , Anna Meadows, MD <sup>†</sup>                                                                                                                                                                                                   |
| Children's Hospital of Pittsburgh, Pittsburgh, PA                           | Jean Tersak, MD <sup>*</sup>                                                                                                                                                                                                                                     |
| Children's National Medical Center, Washington, DC                          | Gregory Reaman, MD <sup>*</sup> , Roger Packer, MD <sup>†</sup>                                                                                                                                                                                                  |
| Cincinnati Children's Hospital Medical Center<br>Cincinnati, OH             | Stella Davies, MD, PhD <sup>*†</sup>                                                                                                                                                                                                                             |
| City of Hope Medical Center, Los Angeles, CA                                | Smita Bhatia, MD <sup>*†</sup>                                                                                                                                                                                                                                   |
| Cook Children's Medical Center, Ft. Worth, TX                               | Paul Bowman, MD, MPH <sup>*</sup>                                                                                                                                                                                                                                |
| Dana-Farber Cancer Institute/Children's Hospital<br>Boston, MA              | Lisa Diller, MD <sup>*†</sup>                                                                                                                                                                                                                                    |
| Fred Hutchinson Cancer Research Center, Seattle, WA                         | Wendy Leisenring, ScD <sup>*†</sup>                                                                                                                                                                                                                              |
| Hospital for Sick Children, Toronto, ON                                     | Mark Greenberg, MBChB <sup>*</sup> ,<br>Paul C. Nathan, MD <sup>*†</sup>                                                                                                                                                                                         |
| International Epidemiology Institute, Rockville, MD                         | John Boice, ScD <sup>*†</sup>                                                                                                                                                                                                                                    |
| Mayo Clinic, Rochester, MN                                                  | Vilmarie Rodriguez, MD <sup>*</sup>                                                                                                                                                                                                                              |
| Memorial Sloan-Kettering Cancer Center, NY, NY                              | Charles Sklar, MD <sup>*†</sup> , Kevin Oeffinger, MD <sup>†</sup>                                                                                                                                                                                               |
| Miller Children's Hospital, Long Beach, CA                                  | Jerry Finklestein, MD <sup>*</sup>                                                                                                                                                                                                                               |
| National Cancer Institute, Bethesda, MD                                     | Roy Wu, PhD <sup>†</sup> , Nita Seibel, MD <sup>†</sup> ,<br>Preetha Rajaraman, PhD <sup>†</sup> , Peter Inskip, ScD <sup>†</sup>                                                                                                                                |
| Nationwide Children's Hospital, Columbus, Ohio                              | Julia Rowland, PhD                                                                                                                                                                                                                                               |
| Northwestern University, Chicago, IL                                        | Amanda Termuhlen, MD <sup>*</sup> , Sue Hammond, MD <sup>†</sup>                                                                                                                                                                                                 |
| Riley Hospital for Children, Indianapolis, IN                               | Kimberley Dilley, MD, MPH <sup>*</sup>                                                                                                                                                                                                                           |
| Roswell Park Cancer Institute, Buffalo, NY                                  | Terry A. Vik, MD <sup>*</sup>                                                                                                                                                                                                                                    |
| St. Louis Children's Hospital, St. Louis, MO                                | Denise Rokitka, MD, MPH <sup>*</sup>                                                                                                                                                                                                                             |
| Stanford University School of Medicine, Stanford, CA                        | Robert Hayashi, MD <sup>*</sup>                                                                                                                                                                                                                                  |
| Texas Children's Hospital, Houston, TX                                      | Neyssa Marina, MD <sup>*</sup> , Sarah S. Donaldson, MD <sup>†</sup>                                                                                                                                                                                             |
| University of Alabama, Birmingham, AL                                       | Zoann Dreyer, MD <sup>*</sup>                                                                                                                                                                                                                                    |
| University of Alberta, Edmonton, AB                                         | Kimberly Whelan, MD, MSPH <sup>*</sup>                                                                                                                                                                                                                           |
| University of California-Los Angeles, CA                                    | Yutaka Yasui, PhD <sup>*†</sup>                                                                                                                                                                                                                                  |
| University of California-San Francisco, CA                                  | Jacqueline Casillas, MD, MSHS <sup>*</sup> ,<br>Lonnie Zeltzer, MD <sup>†</sup>                                                                                                                                                                                  |
| University of Chicago, Chicago, IL                                          | Robert Goldsby, MD <sup>*</sup>                                                                                                                                                                                                                                  |
| University of Michigan, Ann Arbor, MI                                       | Tara Henderson, MD, MPH <sup>*</sup>                                                                                                                                                                                                                             |
| University of Minnesota, Minneapolis, MN                                    | Raymond Hutchinson, MD <sup>*</sup>                                                                                                                                                                                                                              |
| University of Southern California, Los Angeles, CA                          | Daniel Mulrooney, MD, MS <sup>*</sup> ,<br>Joseph Neglia, MD, MPH <sup>†</sup>                                                                                                                                                                                   |
| UT-Southwestern Medical Center, Dallas, TX                                  | Dennis Deapen, DrPH <sup>*†</sup><br>Daniel C. Bowers, MD <sup>*</sup>                                                                                                                                                                                           |

U.T.M.D. Anderson Cancer Center, Houston, TX

Louise Strong, MD<sup>\*†</sup>,  
Marilyn Stovall, MPH, PhD<sup>†</sup>

---

\*Institutional principal investigator.

† Member CCSS Steering Committee.

‡ Project principal investigator (U24 CA55727).
